# Supplementary material
Source: ML conference proceedings conference paper supplement (https://proceedings.neurips.cc/paper_files/paper/2023/hash/8c533f53f76c4df9a7f08e7cb676d132-Abstract.html)
Supplement: Supplementary file 1 [file 8c533f53f76c4df9a7f08e7cb676d132-Supplemental-Conference.zip]

Archive with 2 entries (2 files):
- Fair_HC_NeurIPS_23/codes_fairhc.zip
- Fair_HC_NeurIPS_23/full_paper.pdf
